# Supplementary material
Source: publisher figshare collection journal article supplement (https://frontiersin.figshare.com/ndownloader/files/13570229)
Supplement: Supplementary file [file 13570229]

## *Supplementary Material*

### **Diamond/Porous Titanium Nitride Electrodes with Superior Electrochemical Performance for Neural Interfacing**

**Suzan Meijs, Matthew McDonald, Søren Sørensen, Kristian Rechendorff, Ladislav Fekete, Ladislav Klimša, Václav Petrák, Nico Rijkhoff, Andrew Taylor, Miloš Nesládek, and Cristian P Pennisi\***

\* **Correspondence:** cpennisi@hst.aau.dk

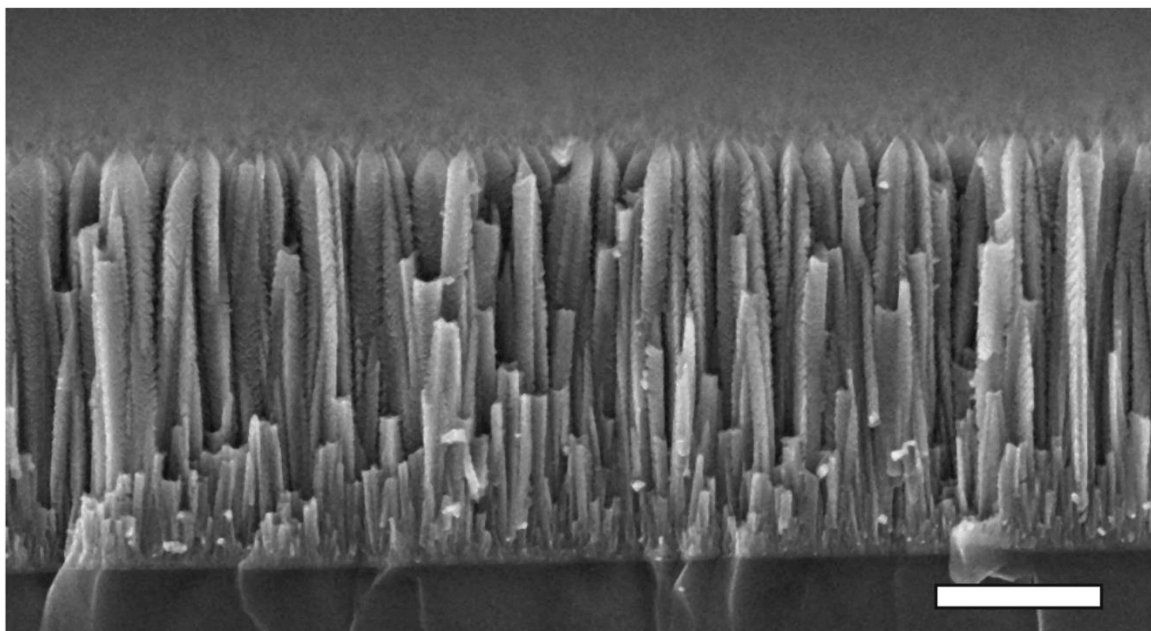

**Supplementary Figure 1.** Cross sectional SEM image of a bare TiN coating showing the high surface area and typical columnar profile of the films. The displayed image corresponds to an electrode type VI. Scale bare denotes 1  $\mu\text{m}$ .

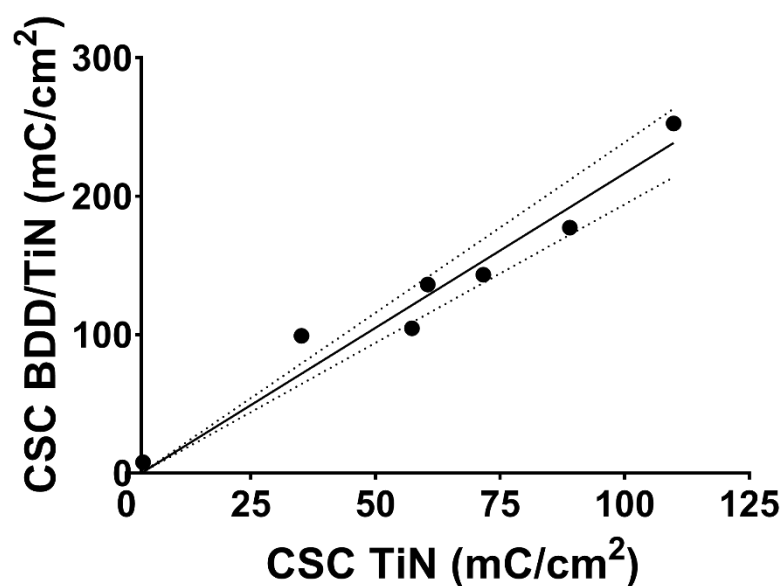

**Supplementary Figure 2.** Correlation between the CSCs of TiN and BDD/TiN electrodes. There is a linear relationship represented by  $y = 2.2x$  ( $r^2=0.95$ ). The stapled line represents the 95% confidence interval.
